# Supplementary material for: A Genome-Wide Association Study of Senegalese Sorghum Seedlings Responding to Pathotype 5 of Sporisorium reilianum
Source: MDPI journal article supplement (doi:10.3390/plants11212999), 2022-11-07
Supplement: s1 [file s1]

**Supplementary Table S1. Spot appearance rate and average time of spot detection.**

| Accession    | Spot appearance rate (%) | Average time (Days) of detection | Accession | Spot appearance rate (%) | Average time (Days) of detection |
|--------------|--------------------------|----------------------------------|-----------|--------------------------|----------------------------------|
| PI514279 (+) | 100                      | 5.8 $\pm$ 0.1                    | PI514342  | 53.3                     | 3.8 $\pm$ 0.4                    |
| PI514284 (+) | 100                      | 4.3 $\pm$ 0.1                    | PI514337  | 52.9                     | 5.2 $\pm$ 0.1                    |
| PI514287     | 100                      | 4.4 $\pm$ 0.3                    | PI514388  | 52.6                     | 3.7 $\pm$ 0.2                    |
| PI514289     | 100                      | 3.6 $\pm$ 0.1                    | PI514364  | 52.4                     | 4.7 $\pm$ 0.1                    |
| PI514295     | 100                      | 4.5 $\pm$ 0.2                    | PI514436  | 52.2                     | 5.2 $\pm$ 0.1                    |
| PI514306     | 100                      | 4.3 $\pm$ 0.3                    | PI514293  | 50                       | 4.7 $\pm$ 0.4                    |
| PI514308     | 100                      | 5.4 $\pm$ 0.2                    | PI514424  | 50                       | 5.9 $\pm$ 0.1                    |
| PI514309     | 100                      | 3.9 $\pm$ 0.2                    | PI514433  | 50                       | 4.2 $\pm$ 0.9                    |
| PI514311     | 100                      | 3.4 $\pm$ 0.1                    | PI514453  | 50                       | 5.0 $\pm$ 0.4                    |
| PI514325     | 100                      | 3.8 $\pm$ 0.2                    | PI514371  | 47.6                     | 4.2 $\pm$ 0.3                    |
| PI514326     | 100                      | 4.0 $\pm$ 0.2                    | PI514346  | 46.7                     | 5.0 $\pm$ 0                      |
| PI514333     | 100                      | 3.7 $\pm$ 0.2                    | PI514401  | 46.7                     | 4.7 $\pm$ 0.2                    |
| PI514345     | 100                      | 4.4 $\pm$ 0.2                    | PI514360  | 45.5                     | 4.0 $\pm$ 0.1                    |
| PI514394     | 100                      | 4.8 $\pm$ 0.1                    | PI514448  | 45.5                     | 4.0 $\pm$ 0                      |
| PI514412     | 100                      | 4.6 $\pm$ 0.2                    | PI514467  | 45                       | 4.3 $\pm$ 0.4                    |
| PI514449     | 100                      | 4.2 $\pm$ 0.3                    | PI514429  | 44.4                     | 2.6 $\pm$ 0.2                    |
| PI514478     | 100                      | 4.0 $\pm$ 0.6                    | PI514379  | 43.8                     | 4.6 $\pm$ 0.2                    |
| PI609251     | 100                      | 4.0 $\pm$ 0                      | PI514368  | 42.9                     | 3.9 $\pm$ 0.4                    |
| PI514294     | 95.7                     | 4.4 $\pm$ 0.2                    | PI514392  | 41.7                     | 4.8 $\pm$ 0.4                    |
| PI514380     | 95.7                     | 3.9 $\pm$ 0.1                    | PI514439  | 40                       | 3.8 $\pm$ 0.4                    |
| PI514341     | 95.5                     | 4.3 $\pm$ 0.1                    | PI514354  | 36.8                     | 4.0 $\pm$ 0                      |
| PI514316     | 95                       | 4.3 $\pm$ 0.2                    | PI514455  | 36.4                     | 5.5 $\pm$ 0.3                    |
| PI514340     | 95                       | 5.1 $\pm$ 0.2                    | PI514372  | 33.3                     | 4.3 $\pm$ 0.2                    |
| PI514283     | 94.1                     | 4.4 $\pm$ 0.3                    | PI514374  | 31.6                     | 4.2 $\pm$ 0.2                    |
| PI514324     | 93.8                     | 4.2 $\pm$ 0.1                    | PI514432  | 31.3                     | 4.4 $\pm$ 0.2                    |
| PI514301     | 92.9                     | 4.5 $\pm$ 0.2                    | PI514376  | 30                       | 4.3 $\pm$ 0.3                    |
| PI514334     | 92.9                     | 4.1 $\pm$ 0.3                    | PI514456  | 30                       | 4.0 $\pm$ 0                      |

|          |      |               |          |      |               |
|----------|------|---------------|----------|------|---------------|
| PI514344 | 91.7 | $4.5 \pm 0.1$ | PI514296 | 28.6 | $5.5 \pm 0.2$ |
| PI514299 | 91.3 | $4.0 \pm 0.2$ | PI514403 | 28.6 | $4.7 \pm 0.7$ |
| PI514313 | 90.9 | $4.0 \pm 0.2$ | PI514405 | 28.6 | $4.8 \pm 0.8$ |
| PI514317 | 90.9 | $4.0 \pm 0.3$ | SC748-5  | 28.6 | $4.0 \pm 0$   |
| PI514338 | 90.9 | $5.0 \pm 0.1$ | PI514322 | 27.3 | $5.0 \pm 0.6$ |
| PI514297 | 90   | $4.9 \pm 0.3$ | PI514425 | 27.3 | $4.3 \pm 0.3$ |
| PI514298 | 89.7 | $5.2 \pm 0.2$ | PI514434 | 27.3 | $4.7 \pm 0.9$ |
| PI514339 | 89.5 | $4.5 \pm 0.1$ | PI514395 | 26.7 | $5.0 \pm 0$   |
| PI514347 | 88.9 | $3.4 \pm 0.3$ | PI514400 | 23.5 | $4.8 \pm 0.5$ |
| PI514361 | 88   | $3.9 \pm 0.2$ | PI514428 | 23.5 | $2.8 \pm 0.5$ |
| PI514314 | 87.5 | $4.6 \pm 0.2$ | PI514452 | 23.1 | $4.0 \pm 0$   |
| PI514302 | 86.7 | $4.7 \pm 0.1$ | PI514465 | 23.1 | $4.3 \pm 0.3$ |
| PI514377 | 85.2 | $4.1 \pm 0.2$ | PI514399 | 21.1 | $4.0 \pm 0$   |
| PI514373 | 85   | $2.8 \pm 0.1$ | PI514336 | 20   | $4.5 \pm 0.5$ |
| PI514414 | 85   | $4.2 \pm 0.2$ | PI514382 | 20   | $4.3 \pm 0.3$ |
| PI514381 | 84.2 | $4.0 \pm 0.1$ | PI514396 | 20   | $5.5 \pm 0.5$ |
| PI514375 | 83.3 | $5.0 \pm 0.3$ | PI514404 | 20   | $5.5 \pm 0.5$ |
| PI514378 | 83.3 | $3.8 \pm 0.3$ | PI514438 | 20   | $5.5 \pm 0.5$ |
| PI514312 | 82.6 | $3.6 \pm 0.2$ | PI514454 | 20   | $5.0 \pm 0$   |
| PI514282 | 81.8 | $4.2 \pm 0.3$ | PI514457 | 20   | $6.0 \pm 0$   |
| PI514285 | 81.8 | $4.6 \pm 0.2$ | PI514461 | 20   | $5.0 \pm 0$   |
| PI514286 | 81.8 | $3.7 \pm 0.4$ | PI514473 | 20   | $3.0 \pm 0$   |
| PI514288 | 81.8 | $4.9 \pm 0.2$ | PI514335 | 18.2 | $5.0 \pm 0$   |
| PI514290 | 81.8 | $3.8 \pm 0.3$ | PI514387 | 18.2 | $5.0 \pm 0$   |
| PI514300 | 80   | $4.6 \pm 0.4$ | PI514444 | 18.2 | $3.5 \pm 0.5$ |
| PI514303 | 80   | $4.8 \pm 0.3$ | PI514440 | 16.7 | $6.0 \pm 0$   |
| PI514332 | 80   | $4.1 \pm 0.2$ | PI514418 | 14.3 | $4.5 \pm 0.5$ |
| PI514472 | 80   | $4.7 \pm 0.3$ | PI514391 | 13.3 | $4.5 \pm 1.5$ |
| PI514310 | 78.6 | $4.1 \pm 0.3$ | PI514423 | 13.3 | $4.0 \pm 0$   |
| PI514318 | 76.9 | $4.4 \pm 0.2$ | PI514458 | 12.5 | $3.5 \pm 0.5$ |

|          |      |               |                         |    |   |
|----------|------|---------------|-------------------------|----|---|
| PI514351 | 76.2 | $4.4 \pm 0.2$ | PI514383                | 10 | 4 |
| PI514362 | 76   | $4.3 \pm 0.2$ | PI514397                | 10 | 6 |
| PI514321 | 75   | $5.7 \pm 0.2$ | PI514427                | 10 | 2 |
| PI514419 | 72.7 | $3.5 \pm 0.2$ | PI514466                | 10 | 4 |
| PI514355 | 72.2 | $3.5 \pm 0.2$ | BTx643                  | 10 | 4 |
| PI514291 | 71.9 | $4.2 \pm 0.2$ | PI514367                | 0  | - |
| PI514320 | 71.4 | $4.2 \pm 0.4$ | PI514390                | 0  | - |
| PI514352 | 71.4 | $3.7 \pm 0.2$ | PI514398                | 0  | - |
| PI514356 | 71.4 | $4.4 \pm 0.2$ | PI514409                | 0  | - |
| PI514304 | 70.8 | $4.8 \pm 0.3$ | PI514417                | 0  | - |
| PI514319 | 70.6 | $4.3 \pm 0.3$ | PI514430                | 0  | - |
| PI514323 | 70   | $4.3 \pm 0.3$ | PI514435                | 0  | - |
| PI514431 | 70   | $3.3 \pm 0.2$ | PI514459                | 0  | - |
| PI514437 | 70   | $4.2 \pm 0.3$ | PI514460                | 0  | - |
| PI514446 | 70   | $4.3 \pm 0.4$ | PI514462                | 0  | - |
| PI514353 | 68.8 | $4.2 \pm 0.2$ | PI514463                | 0  | - |
| PI514366 | 65   | $2.6 \pm 0.1$ | PI514464                | 0  | - |
| PI514363 | 64.7 | $4.2 \pm 0.3$ | PI514468                | 0  | - |
| PI514343 | 62.5 | $4.2 \pm 0.2$ | PI514469                | 0  | - |
| PI514349 | 61.9 | $4.5 \pm 0.1$ | PI514471                | 0  | - |
| PI514393 | 60   | $5.2 \pm 0.2$ | PI514474                | 0  | - |
| PI514292 | 58.3 | $4.0 \pm 0.5$ | PI514475                | 0  | - |
| PI514307 | 58.3 | $4.0 \pm 0.2$ | BTx623                  | 0  | - |
| PI514411 | 58.3 | $4.9 \pm 0.2$ | BTx635                  | 0  | - |
| PI514426 | 58.3 | $4.4 \pm 0.4$ | PI514279<br>Control (-) | 0  | - |
| PI514350 | 57.1 | $3.6 \pm 0.4$ | PI514282<br>Control (-) | 0  | - |
| PI514305 | 55.6 | $3.7 \pm 0.5$ | PI514284<br>Control (-) | 0  | - |
| PI514348 | 55.6 | $4.9 \pm 0.3$ | PI514303<br>Control (-) | 0  | - |

|          |      |           |                                                           |   |   |
|----------|------|-----------|-----------------------------------------------------------|---|---|
| PI514280 | 54.5 | 4.3 ± 0.3 | TAM428                                                    | 0 | - |
| PI514420 | 53.8 | 4.6 ± 0.4 | Pearson's correlation = -0.12 with <i>p</i> -value = 0.14 |   |   |

Among 163 Senegalese accessions, 146 accessions showed symptoms after inoculation with P5 of *S. reilianum*, but the infection rate based on spot appearance varied. Mean values (days) and standard error means (SEM) are shown for timing of symptom confirmation. Accessions in Table 1 are listed from the highest to the lowest infection rates.
